# Supplementary material for: The Effect of Social Media Consumption on Emotion and Executive Functioning in College Students: an fNIRS Study in Natural Environment
Source: Research Square preprint supplement (doi:10.21203/rs.3.rs-5604862/v1), 2024-12-23
Supplement: Supplementary file 1 [file cba0faa0d851111527a61bcf.docx]

**The Effect of Social Media Consumption on Emotion**

**and Executive Functioning in College Students: an fNIRS Study in Natural Environment**

***Supplementary Materials***

**Figure S1.** Group by session interaction effect in Go/No-Go reaction time

**
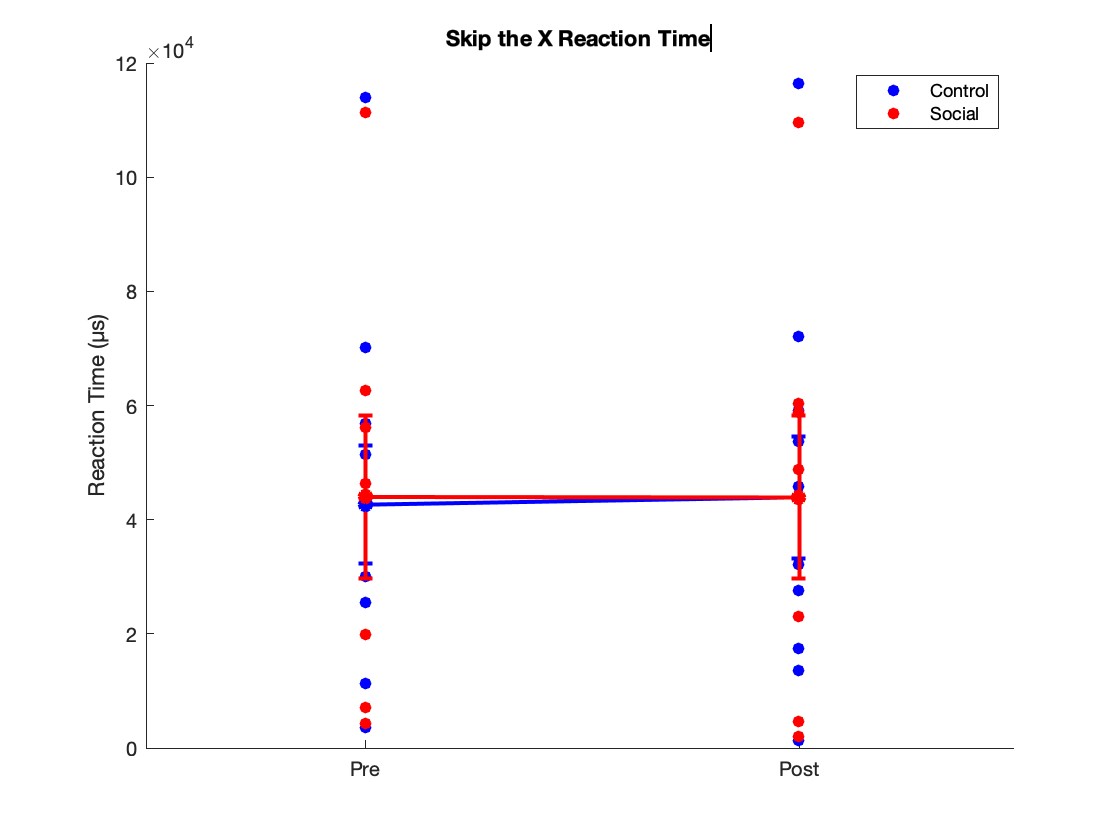
**

**Figure S2.** Group by session interaction effect in 3-back behavioral accuracy

**
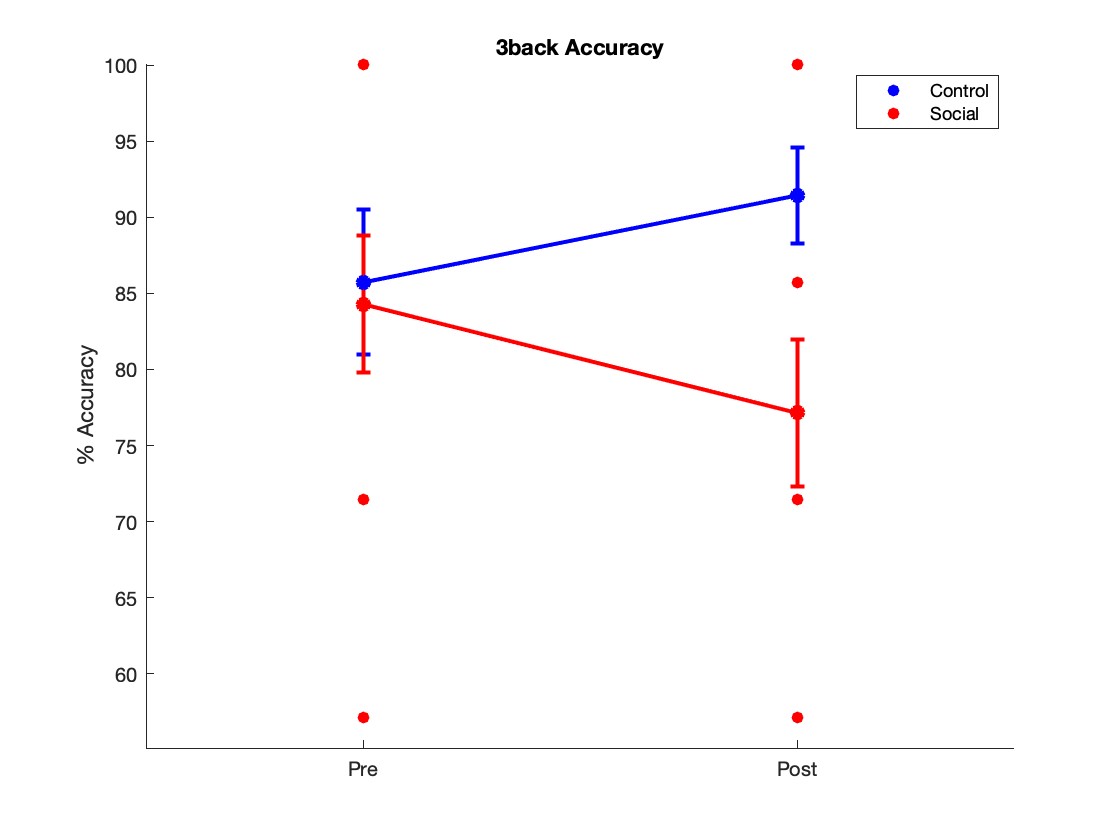
**

**Figure S3.** Group by session significant interaction effect in average DEQ Happiness item score
